# Supplementary material
Source: PubMed Central journal article supplement (PMC3380310)

**A**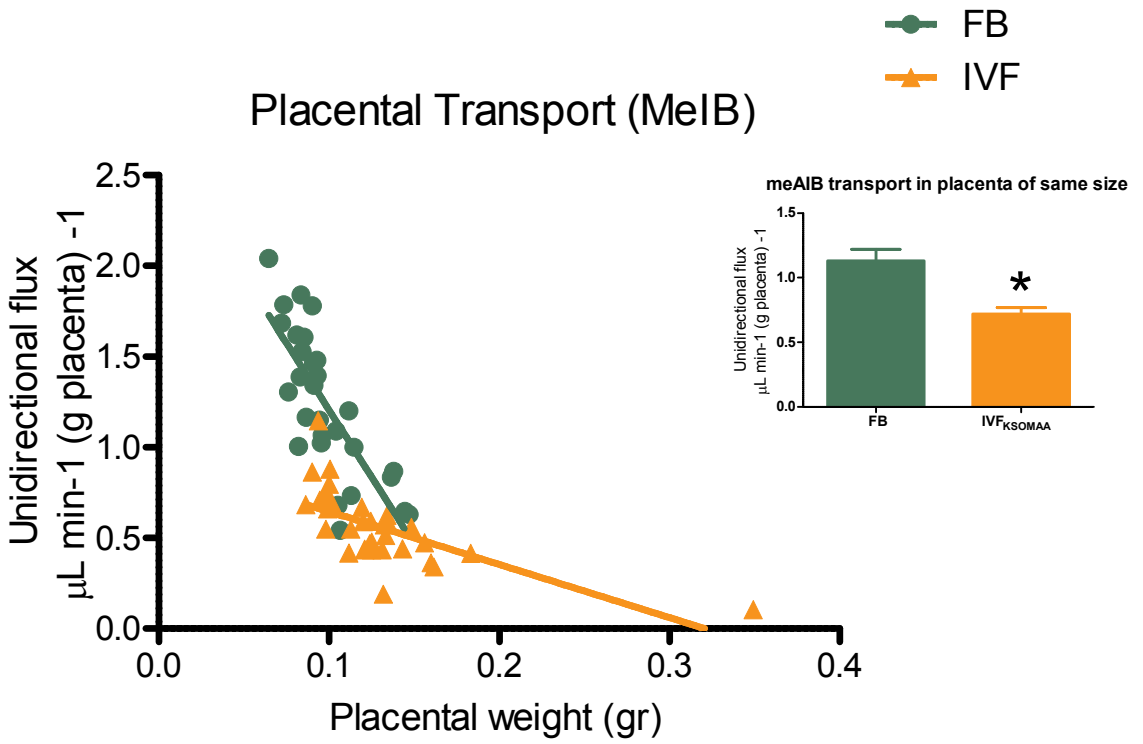**B**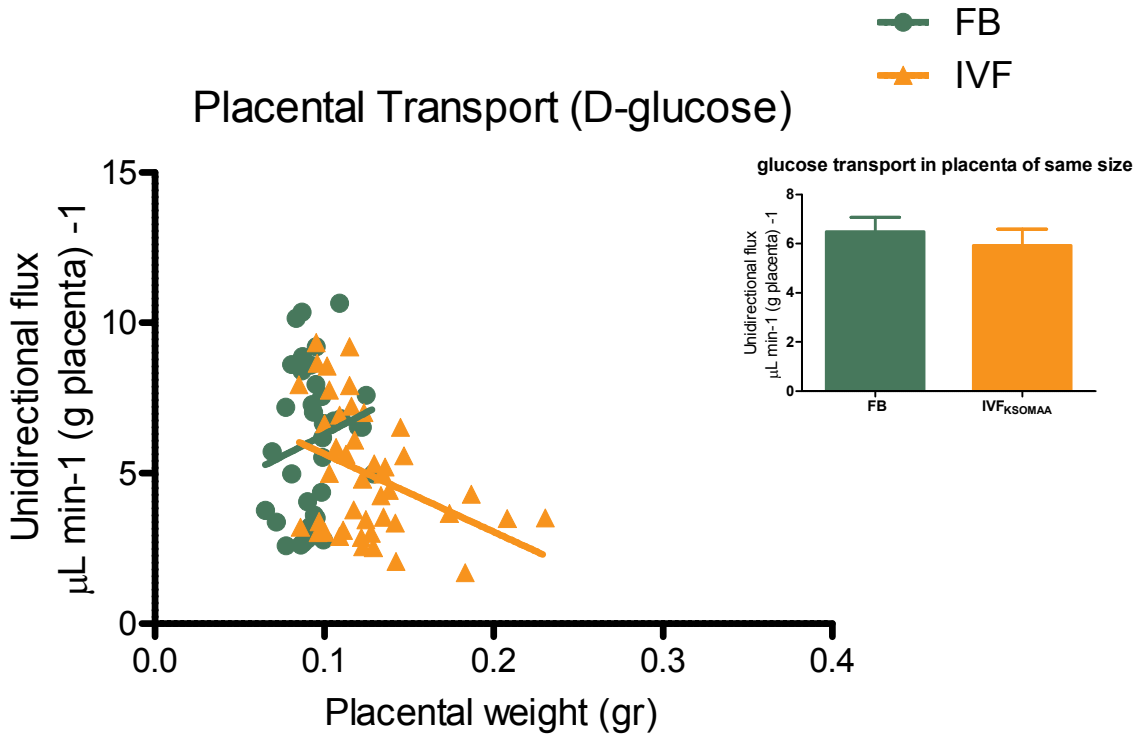

Supplement: supp_en.2011-1921_EN-11-1921_fig1.pdf [file supp_en.2011-1921_EN-11-1921_fig1.pdf]
